# Supplementary material for: Maintenance of Chronological Aging Features in Culture of Normal Human Dermal Fibroblasts from Old Donors
Source: MDPI journal article supplement (doi:10.3390/cells11050858), 2022-03-02
Supplement: s1 [file s1]

## Supplementary Materials and Methods

### *Fibronectin and collagen content*

Primary antibodies were directed against human fibronectin (rabbit polyclonal antibody, Sigma, France) and human collagen (rabbit polyclonal antibody, Origene, Rockville, MD, USA). Goat anti-rabbit Alexa Fluor 594 (Invitrogen, Waltham, MA, USA) was used as conjugate for elastin. Results were expressed as RFU % (relative fluorescence unit vs. total area) / nuclei number ratio in cells. Goat anti-rabbit Alexa Fluor 488 (Invitrogen, Waltham, MA, USA) was used as conjugate. Fluorescent staining was observed using Cytation 5 cell imaging multi-mode reader and quantified using Gen5 image software (BioTek, Winooski, Vermont, USA).

### *In vitro wound healing assay*

Cells were plated at  $38.10^3$  cells/cm<sup>2</sup> in 12-well plates. After 48h incubation, cells reached 100% confluency and a wound was produced at the center of the monolayer by gently scraping the cells with a sterile plastic p200 pipette tip to create a wound. After removing incubation medium and washing with PBS, cell cultures were incubated in with DMEM with 2% FBS 1% P/S in order to limit proliferation. All experimental points were observed using light microscopy on Eclipse Ti-E inverted microscope (Nikon) and analysed using ImageJ software.

**Table S1. List of primers used for qPCR assays.**

| <b>Gene</b>     | <b>Gene ID</b> | <b>Primer</b> | <b>Primer sequence</b>         |
|-----------------|----------------|---------------|--------------------------------|
| <i>TBP</i>      | 6908           | Forward 5'    | TCAAACCCAGAATTGTTCTCCTTAT-3'   |
|                 |                | Reverse 5'    | CCTGAATCCCTTTAGAAATAGGGTAGA-3' |
| <i>RPS17</i>    | 6218           | Forward 5'    | CTC TTTTACCAAGGACCCGCC-3'      |
|                 |                | Reverse 5'    | AGGTTGGACAGACTGCCGAAG-3'       |
| <i>CDKN2A</i>   | 1029           | Forward 5'    | GAAGGTCCCTCAGACATCCC-3'        |
|                 |                | Reverse 5'    | CCCTGTAGGACCTTCGGTGA-3'        |
| <i>HMOX1</i>    | 3162           | Forward 5'    | CTTTCAGAAGGGCCAGGTGA-3'        |
|                 |                | Reverse 5'    | GTAGACAGGGGCGAAGACTG-3'        |
| <i>CAT</i>      | 847            | Forward 5'    | TGCGATTACACCTTTGTGC -3'        |
|                 |                | Reverse 5'    | TTCATCCAGTGATGAGCGGG -3'       |
| <i>SOD2</i>     | 6648           | Forward 5'    | GGCCTACGTGAACAACCTGA-3'        |
|                 |                | Reverse 5'    | CACGTTTGATGGCTTCCAGC-3'        |
| <i>COL1A2</i>   | 1278           | Forward 5'    | TCTGCGACACAAGGAGTCTG-3'        |
|                 |                | Reverse 5'    | AGCAAAGTTCCCACCGAGAC-3'        |
| <i>MMP1</i>     | 4312           | Forward 5'    | ATGAAGCAGCCCAGATGTGGAG-3'      |
|                 |                | Reverse 5'    | TGGTCCACATCTGCTCTTGGCA-3'      |
| <i>MMP3</i>     | 4314           | Forward 5'    | TGAAATTGGCCACTCCCTGG-3'        |
|                 |                | Reverse 5'    | GGAACCGAGTCAGGTCTGTG-3'        |
| <i>MMP12</i>    | 4321           | Forward 5'    | GATGCTGTCACTACCGTGGGAA-3'      |
|                 |                | Reverse 5'    | CAATGCCAGATGGCAAGGTTGG-3'      |
| <i>HBB</i>      | 3043           | Forward 5'    | CATCAAGCGTCCCATAGACTC-3'       |
|                 |                | Reverse 5'    | ACGTGGATGAAGTTGGTGGT-3'        |
| <i>SLCO2B1</i>  | 11309          | Forward 5'    | TGCCGCTCTTCTTTATCGGC-3'        |
|                 |                | Reverse 5'    | GGCAAGATTTGAGGCAGGGG-3'        |
| <i>SERPINA1</i> | 5265           | Forward 5'    | AAGGTGAGATCACCCCTGACG-3'       |
|                 |                | Reverse 5'    | GTCAGTGAATCACGGGCATC-3'        |
| <i>MTND1</i>    | 4535           | Forward 5'    | CAGAGACCAACCGAACCCC-3'         |
|                 |                | Reverse 5'    | GAAGAATAGGGCGAAGGGGC-3'        |
| <i>MTCO1</i>    | 4512           | Forward 5'    | CACACGAGCATATTTAC-3'           |
|                 |                | Reverse 5'    | GTACGATGTCTAGTGATGA-3'         |
| <i>MTTL1</i>    | 4567           | Forward 5'    | CACCCAAGAACAGGGTTTGT-3'        |
|                 |                | Reverse 5'    | TGGCCATGGGTATGTTGTAA-3'        |

**Table S2. Characteristics of cells used for the study.**

| <b>Goup of age</b> | <b>Cells</b> | <b>Age</b> | <b>Sex</b> | <b>Localisation</b> |
|--------------------|--------------|------------|------------|---------------------|
| Young adults       | FS14128      | 18         | Female     | Breast              |
|                    | FS190410     | 19         | Female     | Breast              |
|                    | FS14131      | 20         | Female     | Breast              |
|                    | HNF21053     | 32         | Female     | Abdomen             |
|                    | HNF21046     | 37         | Female     | Breast              |
| Middle-aged adults | FS14002      | 55         | Female     | Breast              |
|                    | HNF21044     | 58         | Female     | Abdomen             |
|                    | HNF20072     | 60         | Female     | Abdomen             |
|                    | FS16037      | 61         | Female     | Breast              |
|                    | FS19034      | 65         | Female     | Breast              |
| Old adults         | HNF21037     | 72         | Female     | Abdomen             |
|                    | HNF73        | 73         | Male       | Eyelid              |
|                    | F103030      | 74         | Female     | Abdomen             |
|                    | HNF210608    | 75         | Female     | Back                |
|                    | HNF78        | 78         | Male       | Eyelid              |

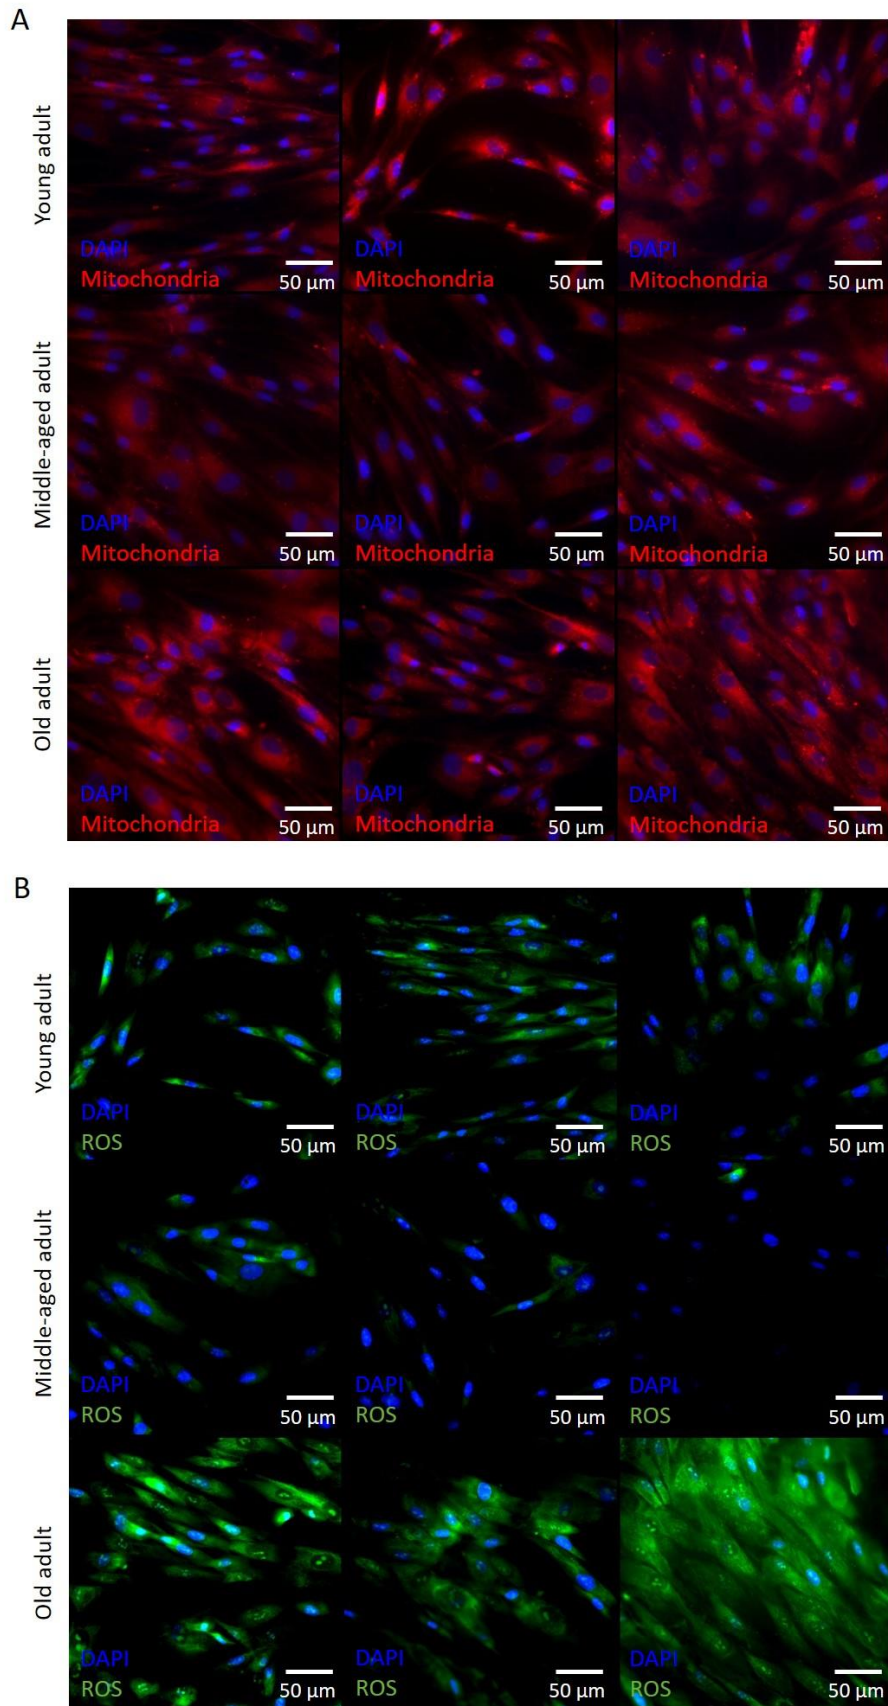

**Figure S1.** Mitochondria and ROS content are modulated by aging. **(A)** Images of immunofluorescent staining of mitochondria in primary fibroblasts using MitoTracker™. **(B)** Images of immunofluorescent staining of ROS in primary fibroblasts using CellROXTM.

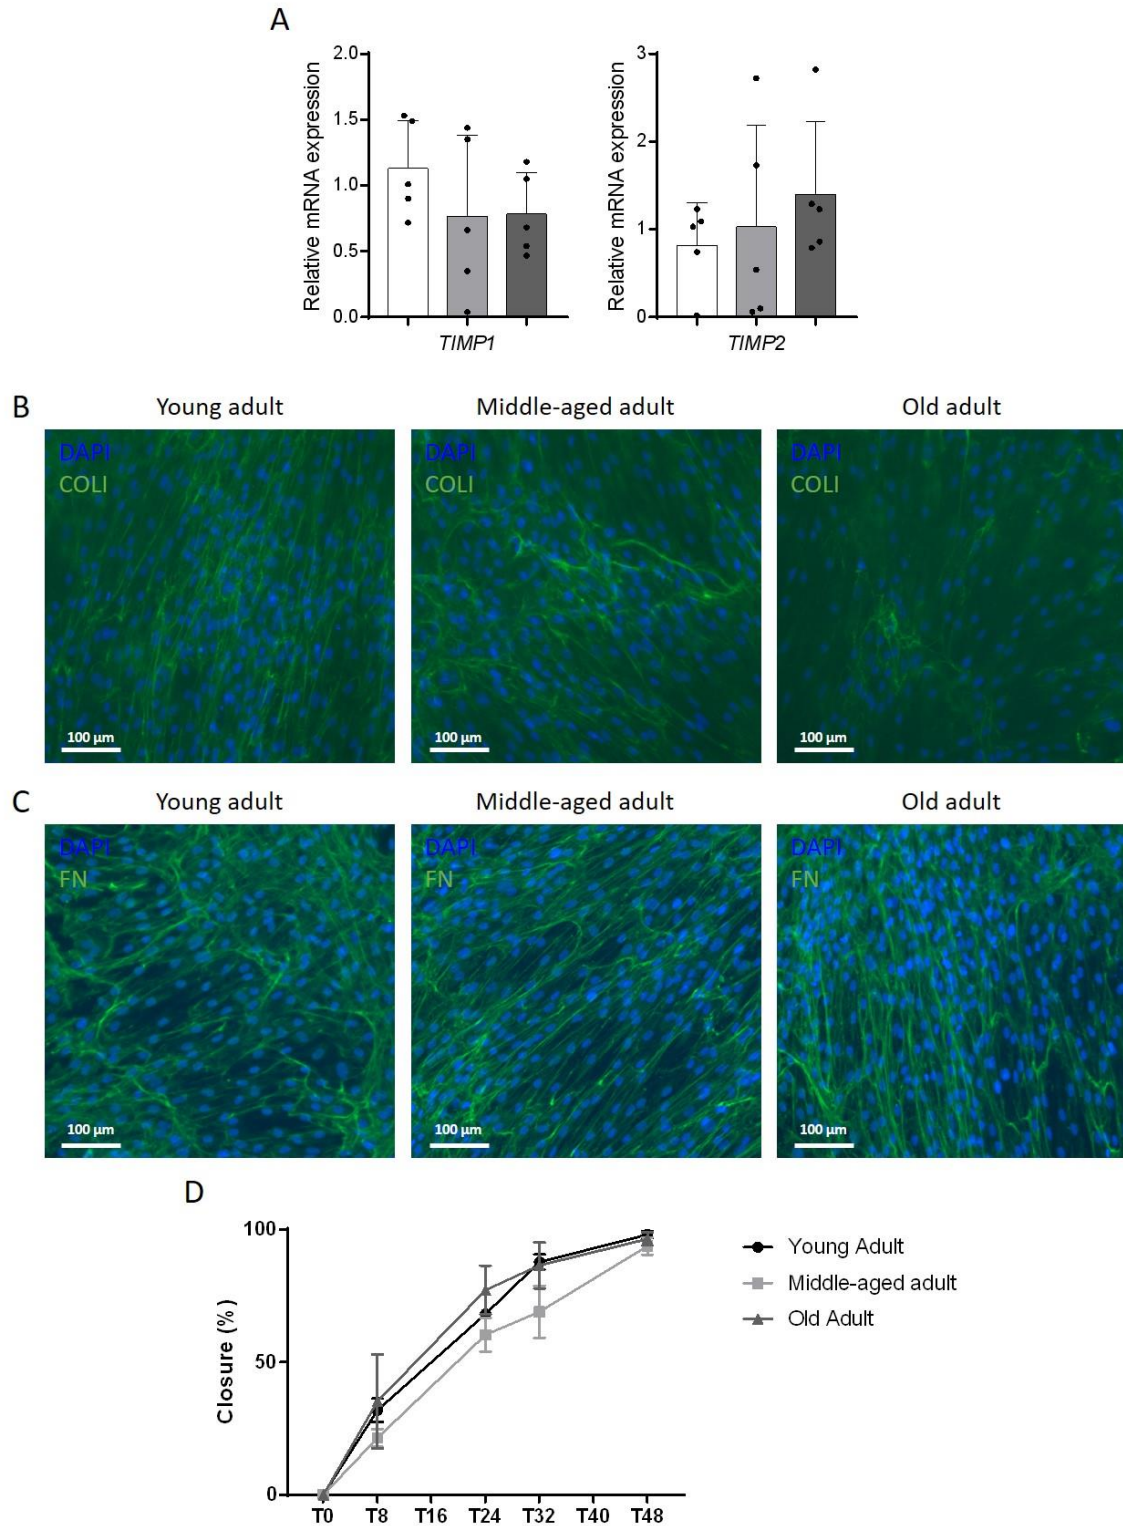

**Figure S2.** Aging affects ECM production but not the migration abilities. **(A)** Relative mRNA expression of TIMP1 and TIMP2 in primary fibroblasts. qPCR analysis was normalized to TBP and RPS17 housekeeping genes using the  $2^{-\Delta\Delta C_t}$  quantification method (mean  $\pm$  SD;  $n=5$ ). Exact p-values were determined using the One-way ANOVA and Tukey post-hoc tests. **(B)** Representative images of immunofluorescent staining of COLI and **(C)** FN in 2D matrix production by primary fibroblasts. **(D)** Analysis of the migration rate of primary fibroblasts in a scratch assay.
